# Supplementary material
Source: PubMed Central journal article supplement (PMC7581231)

## Supplementary Figures

### Osteointegration of 3D-printed fully porous PEEK scaffolds with different pore sizes

Xiaobo Feng<sup>a1</sup>, Liang Ma<sup>a1</sup>, Hang Liang<sup>a1</sup>, Xiaoming Liu<sup>b</sup>, Jie Lei<sup>a</sup>, Wenqiang Li<sup>a</sup>,

Kun Wang<sup>a</sup>, Yu Song<sup>a</sup>, Bingjin Wang<sup>a</sup>, Gaocai Li<sup>a</sup>, Shuai Li<sup>a</sup>, Cao Yang<sup>a\*</sup>

<sup>a</sup> Department of Orthopaedics, Union Hospital, Tongji Medical College, Huazhong University of Science and Technology, Wuhan 430022, China.

<sup>b</sup> Department of Radiology, Union Hospital, Tongji Medical College, Huazhong University of Science and Technology, Wuhan 430022, China.

<sup>1</sup> Co-first authors.

\*Corresponding author.

E-mail address: [caoyangunion@hust.edu.cn](mailto:caoyangunion@hust.edu.cn).

**Figure S1.** Diagram of the results for the quantitative perfusion parameter ME. \*P < 0.05 and \*\*P < 0.01 compared with PEEK-S; #P < 0.05 and ##P < 0.01 compared with PEEK-300. For each group, n = 3.

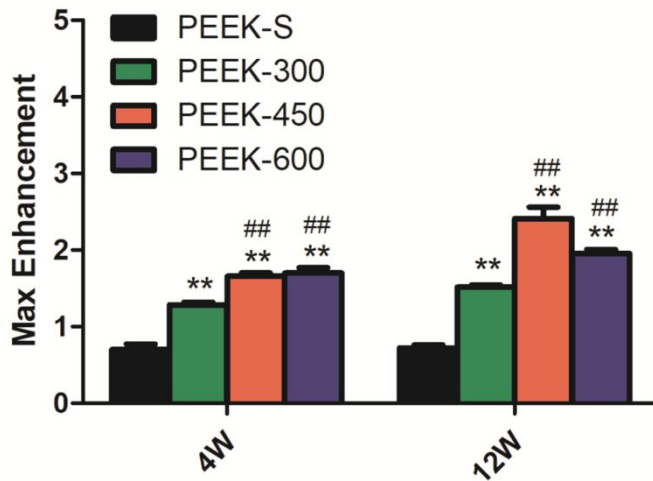

**Figure S2.** Quantitative analysis of micro-CT results of the new bone (BV/TV) in the bone tunnel at 4 and 12 weeks after surgery. \*P < 0.05 and \*\*P < 0.01 compared with PEEK-S; #P < 0.05 and ##P < 0.01 compared with PEEK-300. For each group, n = 3.

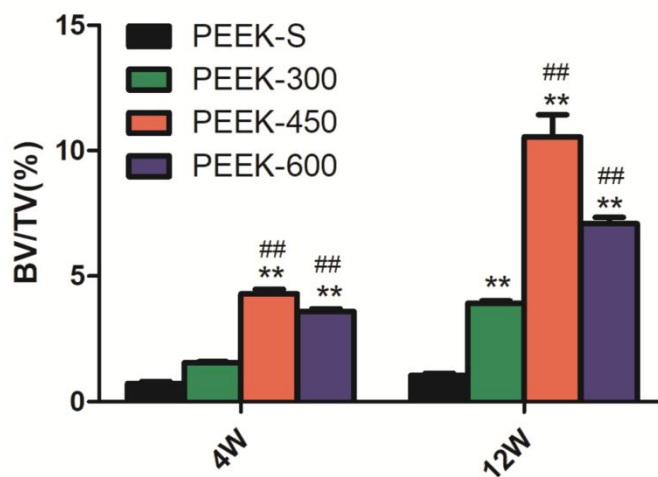

Supplement: ao0c03489_si_001.pdf [file ao0c03489_si_001.pdf]
